# Supplementary material for: Colonies of marine cyanobacteria Trichodesmium interact with associated bacteria to acquire iron from dust
Source: Springer Nature journal article supplement (doi:10.1038/s42003-019-0534-z), 2019-08-02
Supplement: MOESM2 [file 42003_2019_534_MOESM2_ESM.pdf]

## Supplementary Figures

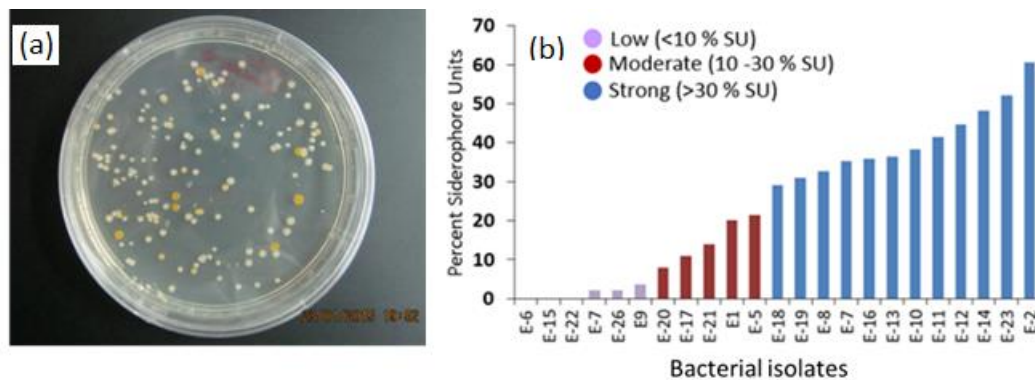

### Supplementary Figure 1

(a) Typical bacteria colonies isolated from natural *Trichodesmium* colonies from Gulf of Aqaba on Zobell's 2216 E medium.

(b) Siderophore producing potential of bacterial isolates from natural *Trichodesmium* colonies. Bacteria were grown in Fe-limited cFSW media medium for 72 hrs and cell free supernatant obtained was assayed for siderophore presence using Chrome Azurol-S assay. Values are expressed as percentage reduction of the Chrome Azurol-S dye at 630 nm in sample with respect to blank-media<sup>1</sup>.

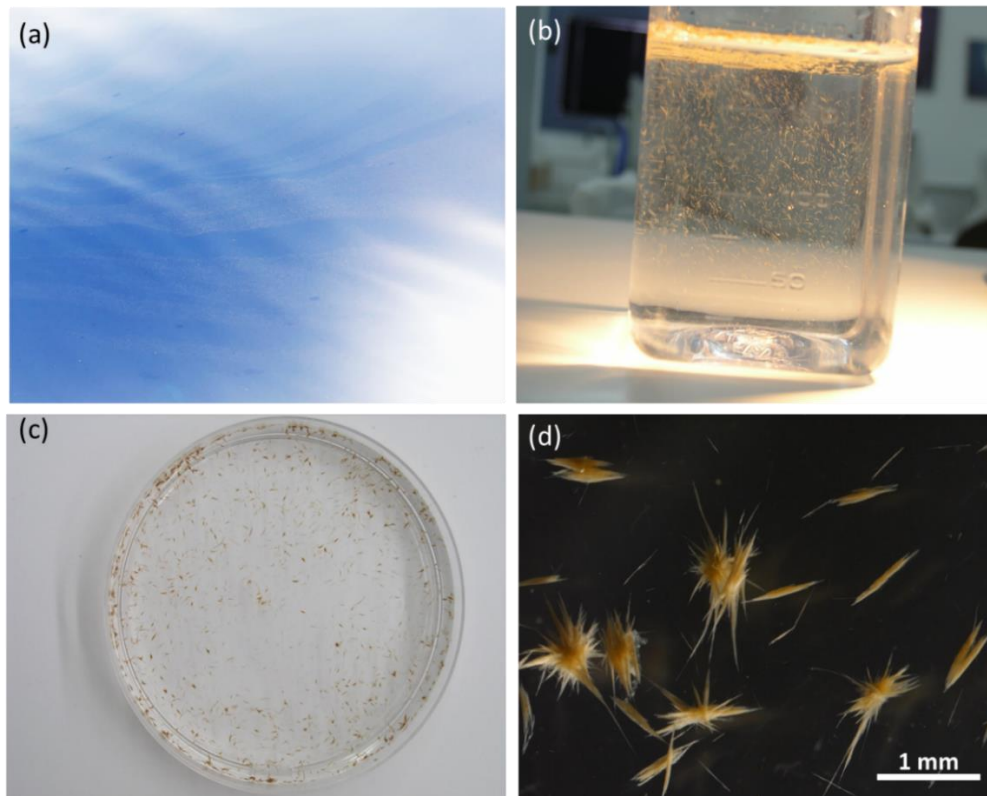

## Supplementary Figure 2

**Collection of *Trichodesmium* blooms for analysis of siderophores.** (a) Surface bloom of *Trichodesmium* in GoA (May-2016); (b) Collected *Trichodesmium* blooms (Gulf of Aqaba, May-1-2016) resuspended for incubations in Nalgene polycarbonate bottles; (c) Colonies re-suspended in filtered seawater waiting transfer for incubations; and (d) Colony morphologies from GoA bloom.

RT: 0.00 - 14.99 SM: 7B

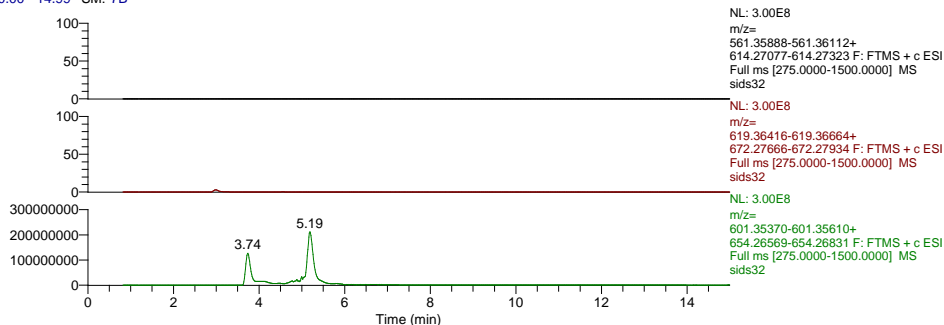
 sids32 #1280-1324 RT: 3.69-3.78 AV: 8 NL: 1.23E8  
 T: FTMS + c ESI Full ms [275.0000-1500.0000]
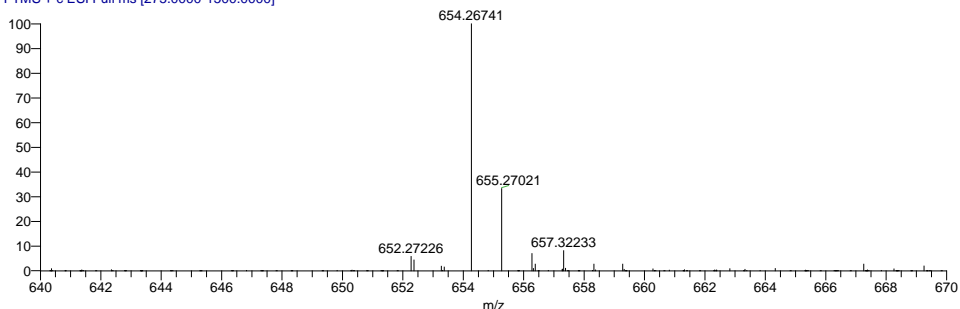
 sids32 #2001-2036 RT: 5.15-5.21 AV: 6 NL: 1.82E8  
 T: FTMS + c ESI Full ms [275.0000-1500.0000]
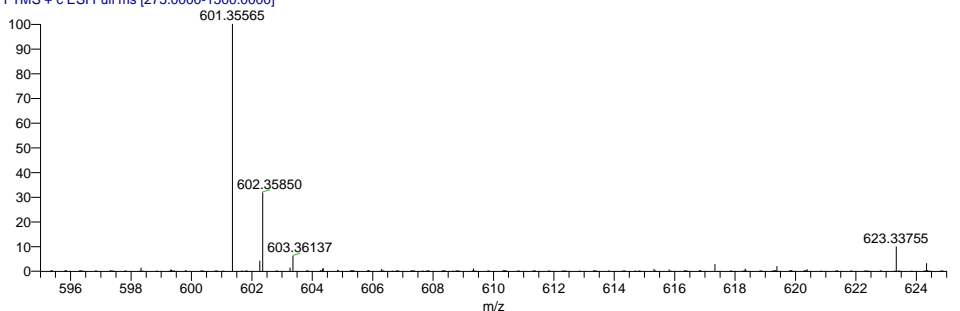
 sids32 #1080-2425 RT: 3.78-5.82 AV: 7 NL: 4.74E5  
 F: FTMS + c ESI d Full ms2 654.2613@hcd32.50 [50.0000-690.0000]
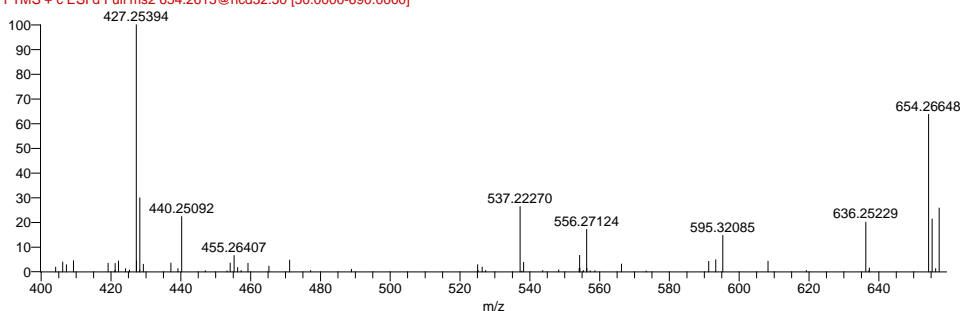

### Supplementary Figure 3

**HPLC-MS analysis of extract from E23 bacterial strain.** Panel (A) shows extracted mass chromatograms (mass tolerance = 1 ppm) for desferrioxamine B ( $[M+H]^+$  m/z 561.360,  $[M-2H+Fe]^+$  m/z 614.272), desferrioxamine G ( $[M+H]^+$  m/z 619.365,  $[M-2H+Fe]^+$  m/z 672.278) and desferrioxamine E ( $[M+H]^+$  m/z 601.355,  $[M-2H+Fe]^+$  m/z 654.267). Panels (B) and (C) shows the mass spectrum obtained for ferrioxamine E and desferrioxamine E respectively. Panel (D) shows the MS<sup>2</sup> spectra obtained for FOE, which resulted in product ions at m/z 636.252 and 537.223 as reported previously for FOE<sup>2</sup>.

## Supplementary Tables

### Supplementary Table 1

*In situ* occurrence of ferrioxamine siderophores and their concentrations during incubation assays with and without dust from Gulf of Aqaba and Arabian Sea as indicated in (Fig. 2 main text).

| Area and Dates       | Incubation Time (d) | Treatments               | Chl <sub>a</sub> (µg L <sup>-1</sup> ) | Trichodesmium Density (10 <sup>5</sup> Trichomes L <sup>-1</sup> ) | Bacterial Density (10 <sup>9</sup> cells L <sup>-1</sup> ) | Bacteria per Trichome (10 <sup>3</sup> cells) | Bacterial Growth (µ d <sup>-1</sup> ) | Ferrioxamines (pM) |      |     |
|----------------------|---------------------|--------------------------|----------------------------------------|--------------------------------------------------------------------|------------------------------------------------------------|-----------------------------------------------|---------------------------------------|--------------------|------|-----|
|                      |                     |                          |                                        |                                                                    |                                                            |                                               |                                       | B                  | G    | E   |
| <b>Arabian Sea</b>   |                     |                          |                                        |                                                                    |                                                            |                                               |                                       |                    |      |     |
| <b>(a) 22-Apr-14</b> | 1.07                | T <sub>0</sub>           | 8.0                                    | 0.6                                                                | 2.6                                                        | 43                                            |                                       | -                  | -    | -   |
|                      |                     | T <sub>final</sub>       | 8.04                                   | 0.5                                                                | 6.9                                                        | 138                                           | 0.9                                   | -                  | 2.1  | -   |
|                      |                     | T <sub>final</sub> +Dust | 8.1                                    | 0.6                                                                | 7.6                                                        | 127                                           | 0.99                                  | -                  | 7    | -   |
|                      |                     | <i>In situ</i> bloom     | 10                                     | 1.6                                                                | 6.6                                                        | 41                                            |                                       | 0.71               | 0.85 | -   |
| <b>Gulf of Aqaba</b> |                     |                          |                                        |                                                                    |                                                            |                                               |                                       |                    |      |     |
| <b>(b) 20-Apr-16</b> | 2.8                 | T <sub>0</sub>           | 30                                     | 4.1                                                                | 2.0                                                        | 5                                             |                                       | -                  | -    | -   |
|                      |                     | T <sub>final</sub>       | 22                                     | 3.6                                                                | 4.2                                                        | 12                                            | 0.41                                  | 96                 | 500  | 457 |
|                      |                     | T <sub>final</sub> +Dust | 24                                     | 3.9                                                                | 16                                                         | 41                                            | 1.1                                   | 183                | 751  | 376 |
| <b>(c) 1-May-16</b>  | 0.96                | T <sub>0</sub>           | 20                                     | 13                                                                 | 3.9                                                        | 3                                             |                                       | 0.6                | -    | -   |
|                      |                     | T <sub>final</sub>       | 20                                     | 12                                                                 | 4.2                                                        | 4                                             | 0.08                                  | 2.0                | 5.0  | -   |
|                      |                     | T <sub>final</sub> +Dust | 20                                     | 13                                                                 | 8.8                                                        | 7                                             | 0.82                                  | 12                 | 20   | 50  |
|                      |                     | <i>In situ</i> bloom     | 62                                     | 27                                                                 | 15                                                         | 6                                             |                                       | 2.3                | 1.1  | 45  |
| <b>(d) 7-May-17</b>  | 1.05                | T <sub>0</sub>           | 8.1                                    | 1.9                                                                | 2.4                                                        | 13                                            |                                       | -                  | 7.0  | 15  |
|                      |                     | T <sub>final</sub>       | 7.9                                    | 1.7                                                                | 2.7                                                        | 16                                            | 0.12                                  | -                  | 13   | 22  |
|                      |                     | T <sub>final</sub> +Dust | 7.9                                    | 1.6                                                                | 3.1                                                        | 19                                            | 2.6                                   | -                  | 9.2  | 15  |
| <b>Filtered Sea</b>  | 1.0                 | T <sub>0</sub>           |                                        |                                                                    |                                                            |                                               |                                       | -                  | -    | -   |
| <b>Water</b>         |                     | T <sub>final</sub>       |                                        |                                                                    |                                                            |                                               |                                       | -                  | -    | -   |
|                      |                     | T <sub>final</sub> +Dust |                                        |                                                                    |                                                            |                                               |                                       | -                  | -    | -   |

- below detection limit/not detected

## Supplementary Table 2

Mineral Fe-dissolution and uptake rates from 100 nM  $^{55}\text{Fe}$  ferrihydrite mineral by *Trichodesmium* and bacteria in presence and absence of siderophores. (Fig. 4 main text). Fe uptake rates from natural colonies reported as mean $\pm$ SD are of two biological replicates. For cultured *Trichodesmium*, all Fe uptake rates are mean $\pm$ SD for n=5.

| Samples/Date                               | Treatments | <i>Trichodesmium</i><br>concentration | Fe dissolution<br>rate<br>(nM d <sup>-1</sup> ) | Fe-Uptake rates<br>(nM d <sup>-1</sup> ) |                 |
|--------------------------------------------|------------|---------------------------------------|-------------------------------------------------|------------------------------------------|-----------------|
|                                            |            |                                       |                                                 | <i>Trichodesmium</i>                     | Bacteria        |
| <b>Natural Colonies</b>                    |            | <b>(Colonies mL<sup>-1</sup>)</b>     |                                                 |                                          |                 |
| 16-Mar-2016                                | Control    | 20                                    | 0.38                                            | 0.34 $\pm$ 0.1                           | 1.07 $\pm$ 0.14 |
|                                            | FOE        |                                       | 1.74                                            | 0.65 $\pm$ 0.15                          | 1.03 $\pm$ 0.43 |
|                                            | FOB        |                                       | 1.65                                            | 0.49 $\pm$ 0.04                          | 0.58 $\pm$ 0.09 |
| 17-Mar-2016                                | Control    | 20                                    | 0.04                                            | 0.07                                     | 0.27            |
|                                            | FOE        |                                       | 0.84                                            | 0.4                                      | 0.20            |
|                                            | FOB        |                                       | 1.1                                             | 0.29                                     | 0.29            |
| 19-Mar-2016                                | Control    | 18                                    | 0.52                                            | 0.06                                     | 0.30            |
|                                            | FOE        |                                       | 2.21                                            | 0.48                                     | 0.45            |
|                                            | FOB        |                                       | 1.93                                            | 0.27                                     | 0.27            |
| 28-Mar-2016                                | Control    | 18                                    | 0.93                                            | 0.84 $\pm$ 0.34                          | 0.26 $\pm$ 0.04 |
|                                            | FOE        |                                       | 2.2                                             | 1.10 $\pm$ 0.26                          | 1.07 $\pm$ 0.40 |
|                                            | FOB        |                                       | 0.95                                            | 0.58 $\pm$ 0.05                          | 0.42 $\pm$ 0.04 |
| 04-Apr-2016                                | Control    | 20                                    | 0.55                                            | 0.07 $\pm$ 0.01                          | 0.17 $\pm$ 0.18 |
|                                            | FOE        |                                       | 1.07                                            | 0.74 $\pm$ 0.07                          | 0.43 $\pm$ 0.10 |
| <b><i>T. erythraeum</i> culture IMS101</b> |            | <b>(Trichomes mL<sup>-1</sup>)</b>    |                                                 |                                          |                 |
| Experiment                                 | Control    | 1.2x10 <sup>4</sup>                   | 0.19                                            | 0.11 $\pm$ 0.04                          | 0.15 $\pm$ 0.05 |
|                                            | FOE        |                                       | 2.41                                            | 0.46 $\pm$ 0.17                          | 0.75 $\pm$ 0.6  |
|                                            | FOB        |                                       | 1.76                                            | 0.27 $\pm$ 0.11                          | 0.42 $\pm$ 0.3  |

### Supplementary Table 3

**Separation of bacteria from *Trichodesmium* in incubations.** The findings from these experiments, summarized in the table below, showed that the non-washed bacteria on the 8  $\mu\text{m}$  filter account for only  $2.8\pm 0.8\%$  of total bacteria associated with the colonies. Further details of the method are provided in Supplementary notes below.

| <b>Cold Separation</b> | <b>Total Bacteria</b><br>( $10^6$ cells $\text{mL}^{-1}$ ) | <b>Bacteria in wash</b><br>( $10^6$ cells $\text{mL}^{-1}$ ) | <b>Residual bacteria associated with <i>Trichodesmium</i></b><br>( $10^6$ cells $\text{mL}^{-1}$ ) | <b>Percentage of residual bacteria associated with <i>Trichodesmium</i></b> |
|------------------------|------------------------------------------------------------|--------------------------------------------------------------|----------------------------------------------------------------------------------------------------|-----------------------------------------------------------------------------|
| Exp-1                  | 5.38                                                       | 5.08                                                         | 0.11                                                                                               | 2.0                                                                         |
| Exp-2                  | 7.81                                                       | 7.20                                                         | 0.28                                                                                               | 3.6                                                                         |
|                        | 7.50                                                       | 7.26                                                         | 0.20                                                                                               | 2.7                                                                         |

## Supplementary Notes

### Trace Metal Clean Techniques

All experimental manipulations were carried out according to stringent trace metal clean protocols<sup>3</sup>. Media and culture bottles and all other plastic ware used were soaked in soap for 48 hrs, washed thoroughly in Ionized water (DI) followed by a 48 hrs wash in 10% HCl and a final rinse in double-distilled water (Milli-Q, 18.2 MΩ·cm) and stored in pre-cleaned bags. Care was taken to handle materials with trace metal clean techniques during radioactive Fe-dissolution and uptake assays from mineral ferrihydrite. Experimental manipulations were performed under positive airflow from high-efficiency particulate air (HEPA) filters, wherever deemed necessary to avoid contamination with non-radiolabelled iron. Iron was removed from the experimental medium using Chelex 100 columns. This chelex-cleaned trace metal free filtered seawater (cFSW) was used for all uptake experiments and for washing of the colonies. Growth media for cultured *Trichodesmium* (YBC-II) was prepared with double-distilled water (Milli-Q, 18.2 MΩ·cm) and analytical or higher-grade reagents in a clean-room. Iron was removed from the nutrient stocks using Chelex 100 columns and all solutions were microwave- or filter-sterilized.

### **Dust collection, sterilization and Fe content**

Atmospheric dust transported mostly from the Sahara and the Arabian Peninsula to the Gulf of Aqaba was collected at the IUI over a period of several weeks using a home-made 1m<sup>2</sup> static PVC aerosol collection device. The device was placed horizontally in front a vertical wall to enable settling of the dust. The dust was sieved through a 200 μm mesh and stored in a desiccator. Particle size distribution was bimodal, featuring small and large particles, with an average diameter of 2.5 ± 1 μm and 21 ± 10 μm, respectively. The large particles were identified by SEM-EDS as NaCl, gypsum, feldspars, carbonates and quartz. The small particles were either in aggregates or adhered to larger particles and were too small to be analyzed individually by EDS. Soluble and acid-leached concentrations of Fe (mgFe/g dust) from this dust analyzed earlier by Torfstein et al.<sup>4</sup> over 24

hours varied from  $0.08 \pm 0.11$  in MiliQ,  $2.4 \pm 1.2$  in Acetic acid and  $8.3 \pm 3.1$  in HF-HNO<sub>3</sub> with a total Fe content of  $10.7 \pm 2.5$  mgFe per g dust.

### **Trichodesmium and bacterial biomass estimation**

**Trichodesmium** Preserved samples of *Trichodesmium* with Lugol's iodine were counted using Sedgewick-Rafter Cell (Pyser-SGI, Kent, UK) under bright-field Nikon Eclipse Ci-E microscope, 10X magnifications as described earlier<sup>5</sup>. For Chl *a* analysis, 2-3 ml of *Trichodesmium* samples from the incubations were filtered on 25 mm dia. GF/F filters and stored at -20°C prior to extraction with 90% acetone. Chl *a* was measured using Turner's fluorometer (Model TD700)<sup>6</sup>

**Bacteria**- Samples for bacteria were preserved with 2% glutaraldehyde (v/v). Prior to staining with DAPI ( $0.1 \mu\text{g ml}^{-1}$ , 15 mins), fixed-colonies were vortexed for 1 min to detach bacterial cells and obtain homogeneity. Stained samples were filtered on  $0.2 \mu\text{m}$  black nuclepore filters and mounted on slides using Nikon non-fluorescent immersion oil. Cells were counted from images captured under 100X magnification using NIKON Eclipse-Ci epifluorescent microscope<sup>7</sup>.

### **Separation of Bacteria from Trichodesmium**

Prior to the uptake assays we conducted several experiments to test the separation efficiency of bacteria from natural *Trichodesmium* colonies. The separation efficiency was estimated by comparing bacterial counts in the following fractions: (1) Total bacteria, (2) Separated bacteria, and, (3) residual colony associated bacteria. The experiments included 24 hrs incubation of natural *Trichodesmium* puff-type colonies ( $\sim 20$  colonies  $\text{mL}^{-1}$ ) with 100 nM ferrihydrite, followed by ferrihydrite removal by Ti-EDTA-Citrate wash solution, separation by size on polycarbonate membrane filters and microscopic counting of bacteria. Total bacterial counts were determined without fractionation, using Ti-EDTA-citrate washed colonies that were fixed with preservative and vortexed to dissociate bacteria. Bacteria in the



two other fractions were collected on 0.2  $\mu\text{m}$  (separated bacteria) and 8  $\mu\text{m}$  (residual colony associated bacteria) polycarbonate nuclepore filters. Filters were rinsed with ~3 mL of FSW five times. The filters were preserved by fixing with ~ 2 ml of 2% glutaraldehyde solution and stained with DAPI to observe bacteria at 100x magnification.

### References:

1. Schwyn, B. & Neilands, H.B. Universal CAS assay for the detection and determination of siderophores. *Analytic. Biochem.* **160**, 47-56 (1987).
2. Mawji, E., Gledhill, M., Worsfold, P.J., & Achterberg, E.P. Collision-induced dissociation of three groups of hydroxamate siderophores: ferrioxamines, ferrichromes and coprogens/fusigens. *Rapid Comm. Mass. Spec.* **22**, 2195 - 2202 (2008).
3. Lis, H. & Shaked, Y. Probing the bioavailability of organically bound iron: A case study in the *Synechococcus* rich waters of the Gulf of Aqaba. *Aquat. Microb. Ecol.* **56**, 241–253 (2009).
4. Torfstein, A. et al. Chemical characterization of atmospheric dust from a weekly time series in the north Red Sea between 2006 and 2010. *Geochim. Cosmochim. Acta.* **211**, 373-393 (2017).
5. Basu, S. & Shaked, Y. Mineral iron utilization by natural and cultured *Trichodesmium* and associated bacteria. *Limnol. Oceanogr.* **63**, 2307-2320 (2018).
6. Analytical Methods of the Israel National Monitoring Program at the Gulf of Eilat. <http://www.iuieilat.ac.il/Research/NMPMethods.aspx>
7. Sherr, B. F., E. B. Sherr, & P. del Giorgio. in *Methods in microbiology, Marine microbiology* vol. 30 (ed. J. Paul) 129–159 (Academic Press, 2001).
